# Supplementary material for: Assessment of a Peer Physician Coaching Partnership Between a Designated Cancer Center Genetics Service and a Community Cancer Network Hospital
Source: PubMed Central journal article supplement (PMC9989894; doi:10.1001/jamanetworkopen.2023.1723), 2023-03-06
Supplement: jamanetwopen-e231723-s001.pdf [file jamanetwopen-e231723-s001.pdf]

## Data Sharing Statement

Santos. Assessment of a Peer Physician Coaching Partnership Between a Designated Cancer Center Genetics Service and a Community Cancer Network Hospital. *JAMA Netw Open*. Published March 06, 2023. doi:10.1001/jamanetworkopen.2023.1723

### Data

**Data available:** No

### Additional Information

**Explanation for why data not available:** researchers can email corresponding authors regarding potential collaboration
